# Supplementary material
Source: Springer Nature journal article supplement (https://www.springermedizin.de/resource/supplementary/12943_2011_986_MOESM2_ESM.pdf/9552184)
Supplement: MOESM2 [file 9552184]

**Prostate  
cancer**

```
graph TD; PC(Prostate cancer) --> DKK1{{DKK1}}; PC --> Wnt{{Wnt}}; DKK1 -- "RANKL  
PTHrP  
IL-6" --> OP(Osteolytic phase); Wnt -- "BMP  
PTHrP  
OPG" --> OB(Osteoblastic phase);
```

The diagram illustrates the pathways from Prostate cancer to two distinct bone metastasis phases. At the top, 'Prostate cancer' is shown in an orange circle. Two arrows point downwards to 'DKK1' (a yellow-to-red gradient hexagon) and 'Wnt' (a yellow-to-red gradient octagon). From 'DKK1', a vertical arrow points down to 'Osteolytic phase' (a red rounded rectangle), with the text 'RANKL', 'PTHrP', and 'IL-6' positioned to the right of the arrow. From 'Wnt', a vertical arrow points down to 'Osteoblastic phase' (a red rounded rectangle), with the text 'BMP', 'PTHrP', and 'OPG' positioned to the right of the arrow.

**DKK1**

**Wnt**

**RANKL  
PTHrP  
IL-6**

**BMP  
PTHrP  
OPG**

**Osteolytic  
phase**

**Osteoblastic  
phase**
